# Supplementary material for: Single-atom catalysis enabled by high-energy metastable structures
Source: Royal Society of Chemistry journal article supplement (doi:10.1039/d2sc06962h), 2023-01-01
Supplement: d2sc06962h1.pdf [file d2sc06962h1.pdf]

Supporting Information for

# **Single-Atom Catalysis Enabled by High-Energy Metastable Structures**

Zhaoming Xia, Yue Yin, Jun Li, Hai Xiao\*

Department of Chemistry and Key Laboratory of Organic Optoelectronics & Molecular  
Engineering of Ministry of Education, Tsinghua University, Beijing 100084, China

## Additional computational details

The surface structure of CeO<sub>2</sub>(110) is shown in **Figure S1**, and we consider the Ce site, O site, O bridging site, and 4-fold hollow site labeled in **Figure S1** for accommodating M<sub>1</sub>. This results in three types of M<sub>1</sub>/CeO<sub>2</sub> SACs: 1) the M atom substituting the Ce site<sup>1-2</sup>, labelled as M<sub>subCe</sub> (**Figure S2**); 2) the M atom substituting the O site<sup>3</sup>, labelled as M<sub>subO</sub> (**Figure S3**); 3) the M atom supported on the O bridging site or the 4-fold hollow site<sup>4-7</sup>, labelled as M<sub>support</sub> (**Figure S4**). In addition, when SACs are exposed to an oxidizing or reducing environment, the surface O stoichiometry may vary. Thus, additional types are derived from M<sub>subCe</sub> and M<sub>support</sub> by adding or removing O atoms on the surface, which are labeled as M<sub>subCe-O</sub> (**Figure S5**), M<sub>subCe+O</sub> (**Figure S6**), M<sub>support-O</sub> (**Figure S7**), M<sub>support+O</sub> (**Figure S8**), respectively. The M<sub>subO</sub> type requires the reducing environment to create the O vacancy (O<sub>v</sub>) for hosting M<sub>1</sub>, and it turns into the M<sub>subCe</sub> or M<sub>support</sub> type under the oxidizing environment, so there is no new type derived from it.

The Gibbs free energy corrections (including both the enthalpic and entropic terms) of gas phase molecules and surface-adsorbed species were calculated with the ideal-gas approximation and the harmonic approximation for the vibrational degrees of freedom using the thermochemistry modules of the Atomic Simulation Environment (ASE).

The formation energy ( $\Delta G_f$ ) of SAC is calculated using the following equation,

$$\Delta G_f = E_{M-CeO_2-xCe_v-yO_v} - E_{CeO_2} - E_{M-bulk} + x\mu_{Ce} + y\mu_O$$

where  $E_{M-CeO_2-xCe_v-yO_v}$  is the energy of SAC;  $x$  is the number of Ce vacancies;  $y$  is the number of O<sub>v</sub> (if  $y < 0$ ,  $-y$  is the number of extra O atoms);  $E_{CeO_2}$  is the energy of pristine CeO<sub>2</sub> surface;  $E_{M-bulk}$  is the energy per atom of the metal bulk;  $\mu_O$  is the chemical potential of O, and  $\mu_{Ce}$  is the chemical potential of Ce in CeO<sub>2</sub>, calculated as

$$\mu_{Ce} = E_{CeO_2-bulk} - 2\mu_O$$

where  $E_{CeO_2-bulk}$  is the energy per CeO<sub>2</sub> unit of CeO<sub>2</sub> bulk.

The  $\mu_O$ -dependent  $\Delta G_f$ 's for all SACs are shown in **Figure S9**. The most stable phase changes significantly with  $\mu_O$  for all the SACs, and this indicates that the local structure of SAC under reaction conditions can be quite different from the result of *ex situ* characterization. In order to correspond to the real reaction conditions,  $\mu_O$  is mapped into a function of temperature and partial pressure of a typical gas in the reaction environment. We consider two typical reaction conditions,

1. In the oxidative condition, we take the O<sub>2</sub> gas as the representative, and

$$\mu_O = \frac{1}{2}G_{O_2}$$

where  $G_{O_2}$  is the Gibbs free energy of O<sub>2</sub> gas.

2. In the reductive condition, we take the H<sub>2</sub> gas as the representative, and  $\mu_{\text{O}}$  is defined as follows,<sup>8</sup>

$$\mu_{\text{O}} = G_{\text{H}_2\text{O}} - G_{\text{H}_2}$$

where  $G_{\text{H}_2\text{O}}$  and  $G_{\text{H}_2}$  are the Gibbs free energies of water vapor and H<sub>2</sub> gas, respectively.

Based on the  $\Delta G_f$ 's of all types of structures for each SAC, we calculate the phase diagrams of SACs under different reaction conditions (**Figures S10-S12**), according to the Boltzmann distribution.

### **Supplementary Note on the partial pressure of HCOOH**

In the experiments, alkali solutions were widely used to absorb HCOOH to achieve large TOFs, and this results in extremely small concentrations of HCOOH in the solution. If we assume that there is already 0.1 M HCOOH produced and absorbed in the alkaline solution with a pH of 14, based on the pKa (3.74) of HCOOH, the concentration of HCOOH ([HCOOH]) is only  $10^{-11.26}$  M ([HCOO<sup>-</sup>] is approximately  $10^{-1}$  M). Then, according to the Henry's law constant of HCOOH in water solution ( $8.9 \times 10^3$  M/bar, taken from *J. Atmos. Chem.* **1996**, *24*, 113-119), the vapor pressure of HCOOH is  $0.6 \times 10^{-15}$  bar. In our microkinetic modeling, the partial pressure of HCOOH was thus set to  $10^{-15}$  bar in accordance with the experiments' conditions.

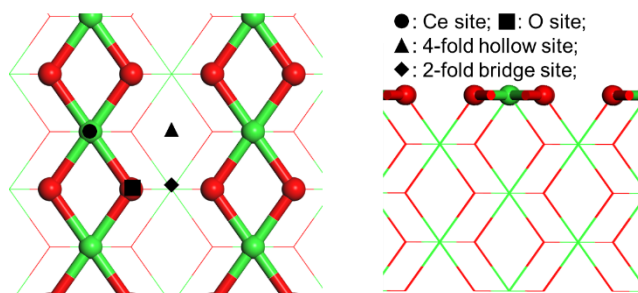

**Figure S1.** Surface structure of  $\text{CeO}_2(110)$  and the sites considered in this study. Left: top view; right: side view.

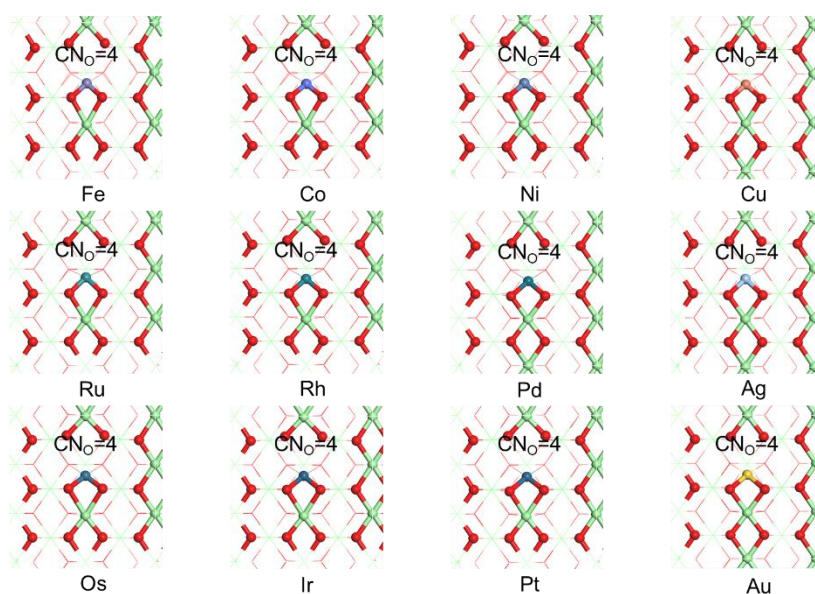

**Figure S2.** Optimized structures of the  $M_{\text{subCe}}$  type of  $M_1/\text{CeO}_2$  SACs. Note that the  $M_1$  substituting Ce is relaxed to a more stable 4-fold coordinated configuration different from that of the original Ce.

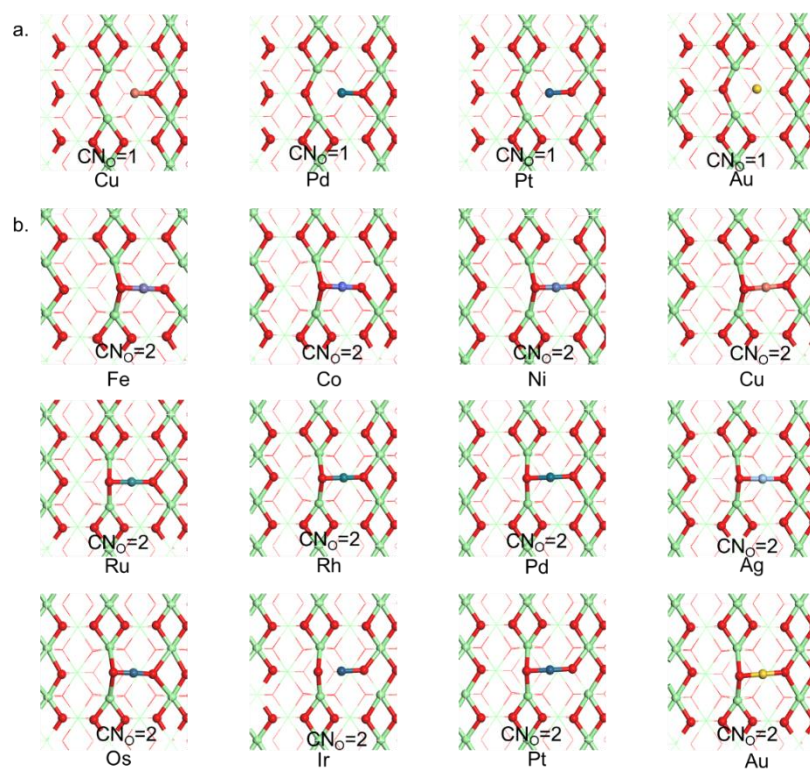

**Figure S3.** Optimized structures of the  $M_{\text{sub}O}$  type of  $M_1/\text{CeO}_2$  SACs. a:  $M_{\text{sub}O-1}$ ; b:  $M_{\text{sub}O-2}$ . Only

Cu, Pd, Pt and Au can be relaxed into  $M_{\text{sub}O-1}$  configuration.

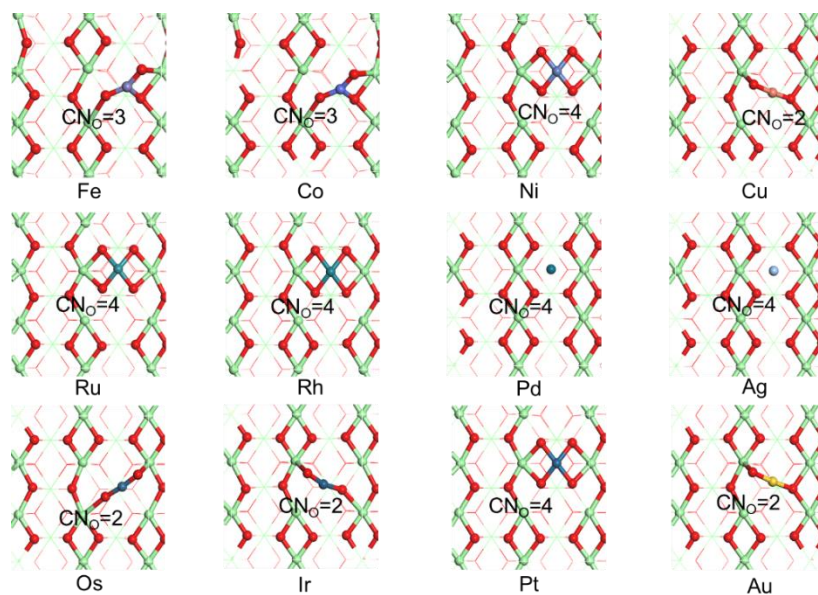

**Figure S4.** Optimized structures of the  $M_{\text{support}}$  type of  $M_1/\text{CeO}_2$  SACs. For Ni, Ru, Rh, Pd, Ag, and Pt, the  $M_1$  prefers to adsorb at the 4-fold hollow site, while for Cu, Os, Ir, and Au, the  $M_1$  prefers to adsorb at the 2-fold bridge site. For Fe and Co, the  $M_1$  prefers to adsorb at the 4-fold hollow site but is relaxed to a more stable distorted 3-fold coordinated configuration.

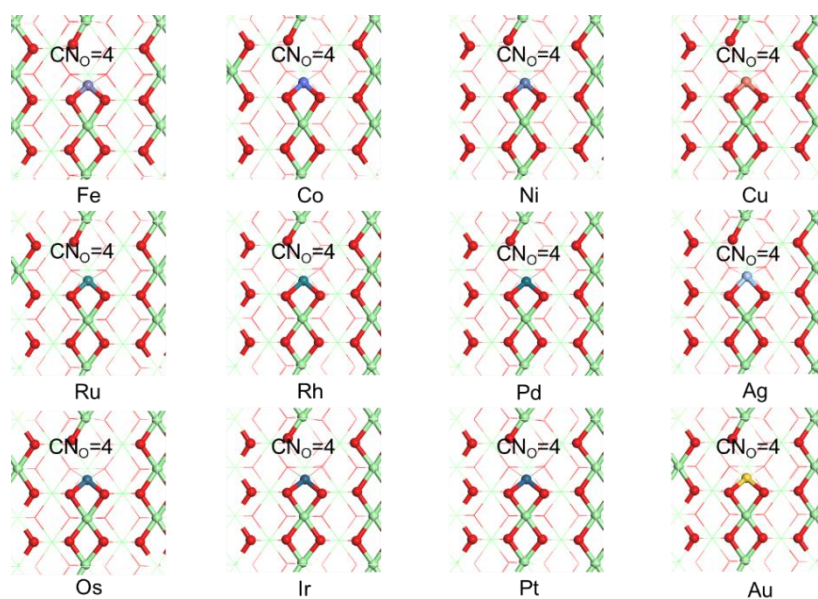

**Figure S5.** Optimized structures of the  $M_{\text{subCe-O}}$  type of  $M_1/\text{CeO}_2$  SACs.

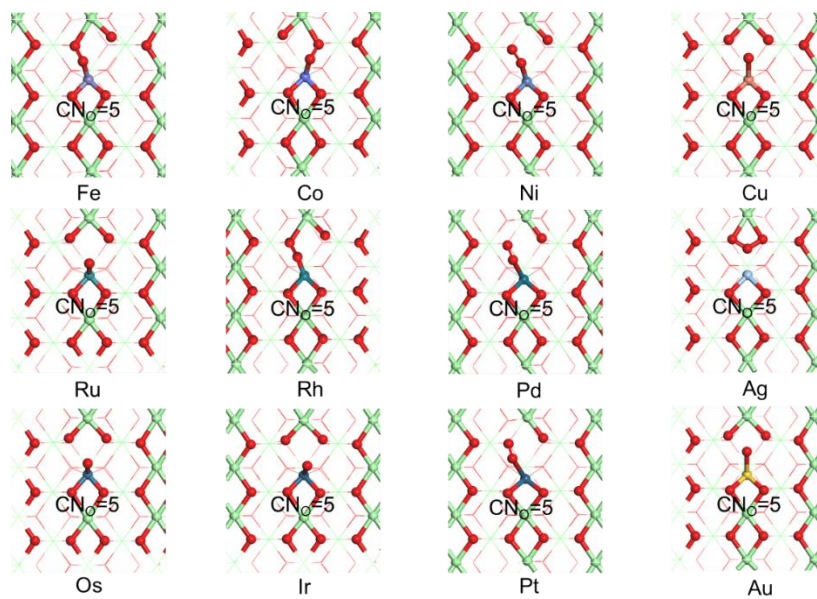

**Figure S6.** Optimized structures of the  $M_{\text{subCe+O}}$  type of  $M_1/\text{CeO}_2$  SACs.



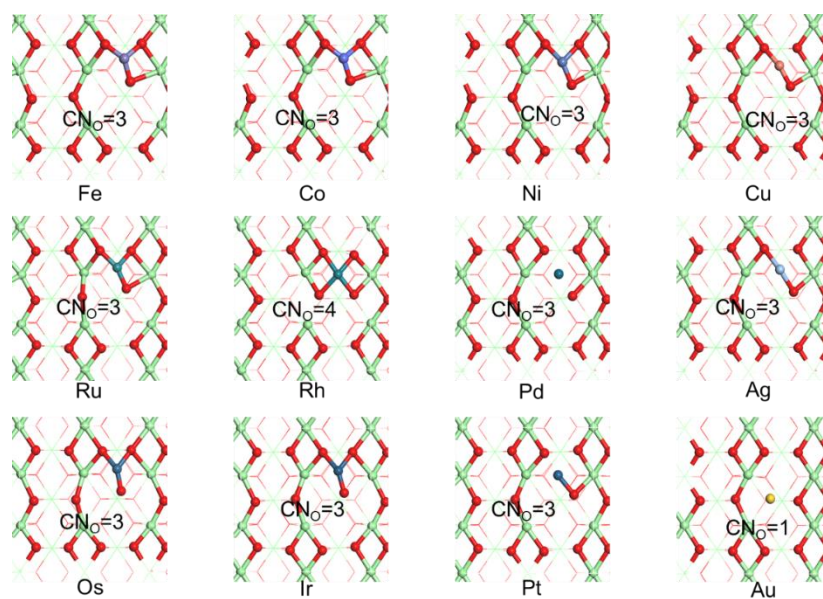

**Figure S7.** Optimized structures of the  $M_{\text{support-O}}$  type of  $M_1/\text{CeO}_2$  SACs. Among all the  $M_{\text{support-O}}$  structures,  $\text{Au}_1$  is relaxed to the same local structure as  $M_{\text{subO-1}}$ , while all the other  $M_1$ 's are optimized to a new type of local structures. Note that only the O atoms near  $M_1$  in  $M_{\text{support}}$  are removed to model the local structure of active site in reductive environment, even though the formation energy of  $\text{O}_v$  at further sites may be lower, because the formation of  $\text{O}_v$  far from  $M_1$  does not change the local coordination of  $M_1$ .



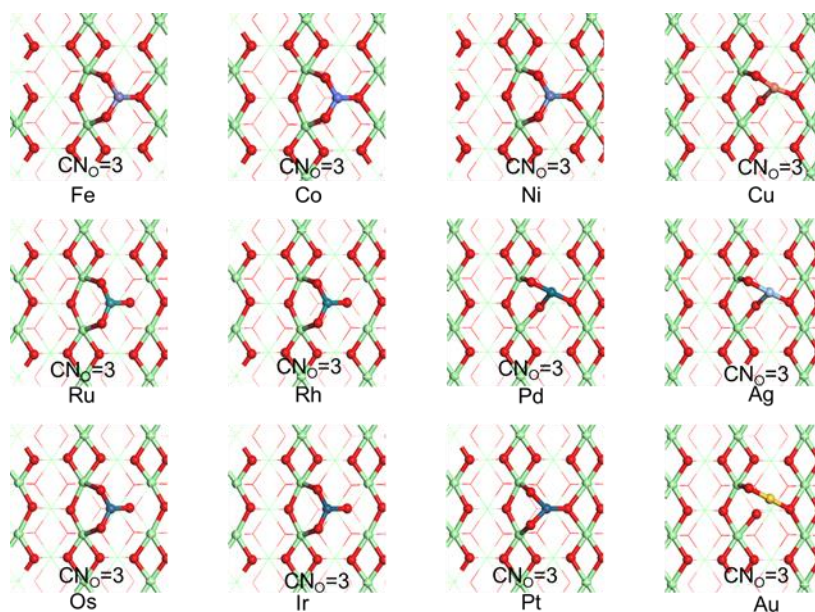

**Figure S8.** Optimized structures of the  $M_{\text{support}+O}$  type of  $M_1/\text{CeO}_2$  SACs.

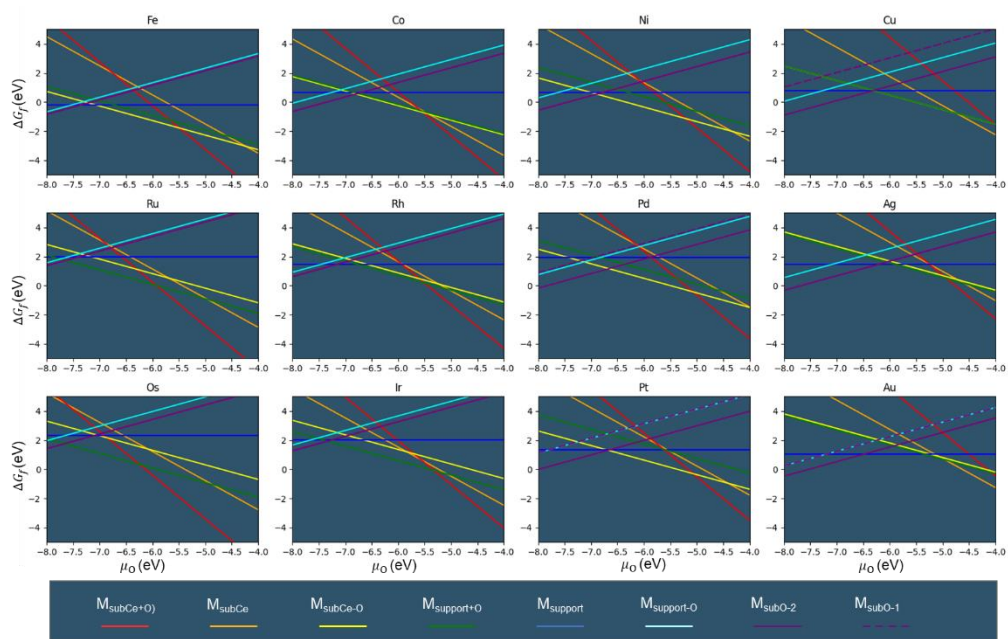

**Figure S9.** The  $\mu_{\text{O}}$ -dependent formation energies of all SACs.

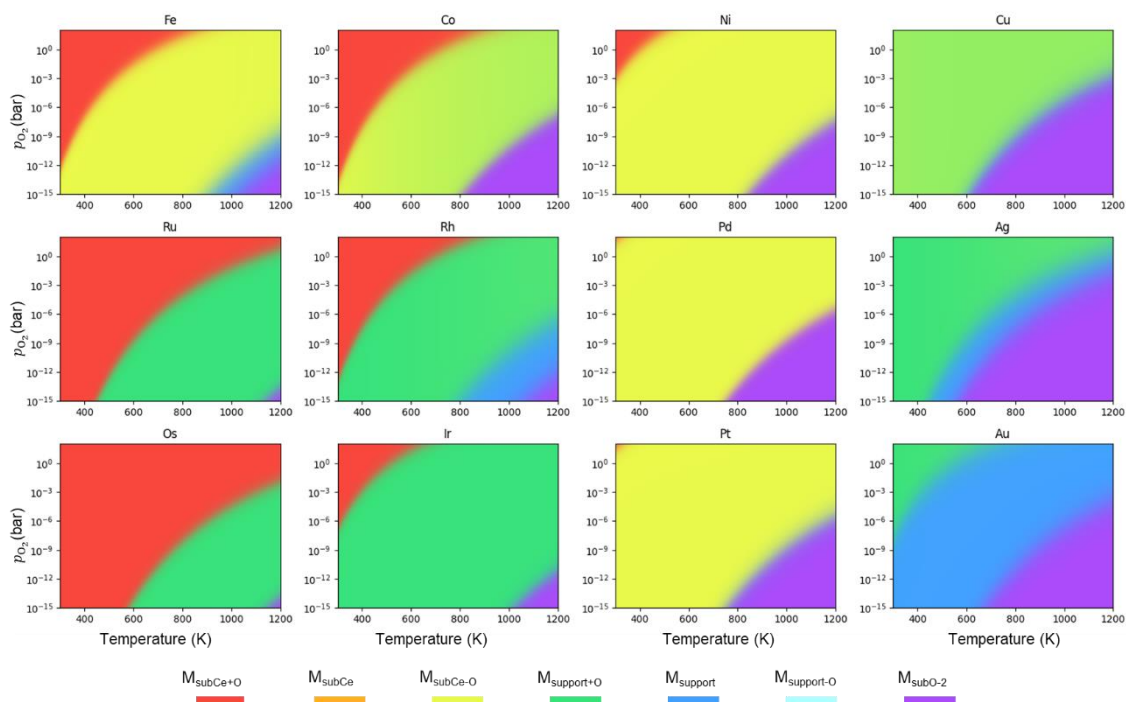

**Figure S10.** Phase diagrams of  $M_1/\text{CeO}_2$  SACs in oxidative conditions. Each phase is represented by a distinct RGB color ( $RGB_i$ ), and the color of each point in the phase diagram is defined as the overlay of  $RGB_i$  weighted by the proportion of each phase. Therefore, the yellow and green color mixing area in the phase diagram of Co SAC indicates a coexistence of  $\text{Co}_{\text{subCe-O}}$  and  $\text{Co}_{\text{support+O}}$  types of structures, this is because their formation energies are close, with an energy difference of only 0.07 eV.

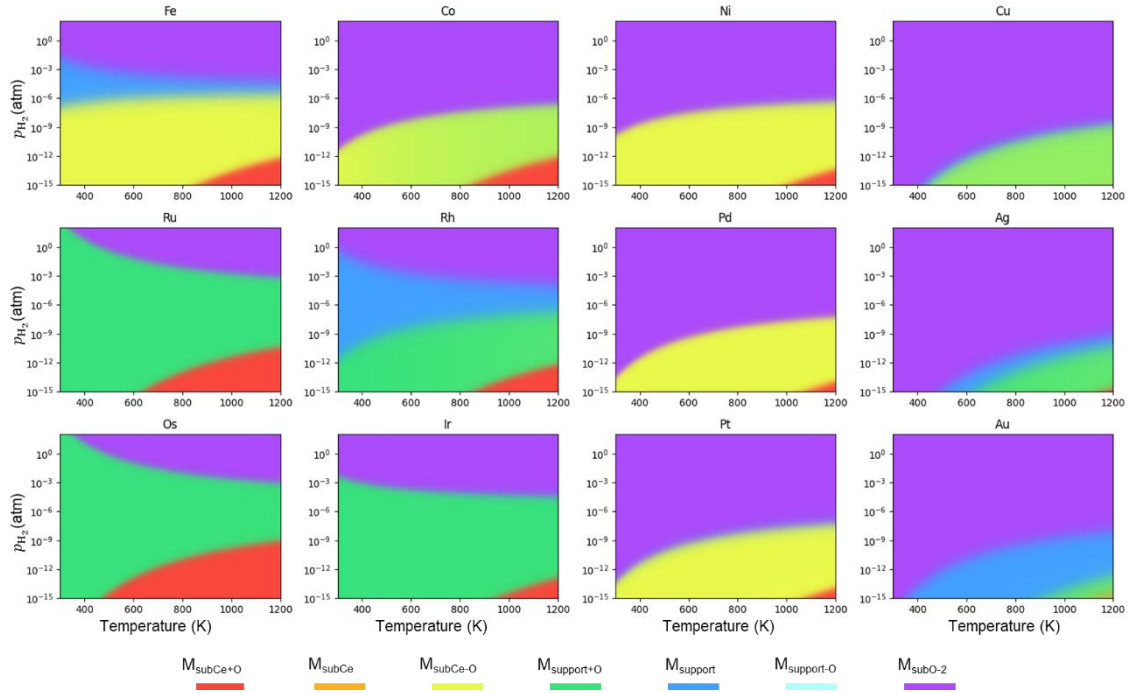

**Figure S11.** Phase diagrams of  $M_1/\text{CeO}_2$  SACs in reductive conditions. The partial pressure of water vapor is  $10^{-4}$  bar. Each phase is represented by a distinct RGB color ( $RGB_i$ ), and the color of each point in the phase diagram is defined as the overlay of  $RGB_i$  weighted by the proportion of each phase. Therefore, the yellow and green color mixing area in the phase diagram of Co SAC indicates a coexistence of  $\text{Co}_{\text{subCe-O}}$  and  $\text{Co}_{\text{support+O}}$  types of structures, this is because their formation energies are close, with an energy difference of only 0.07 eV.

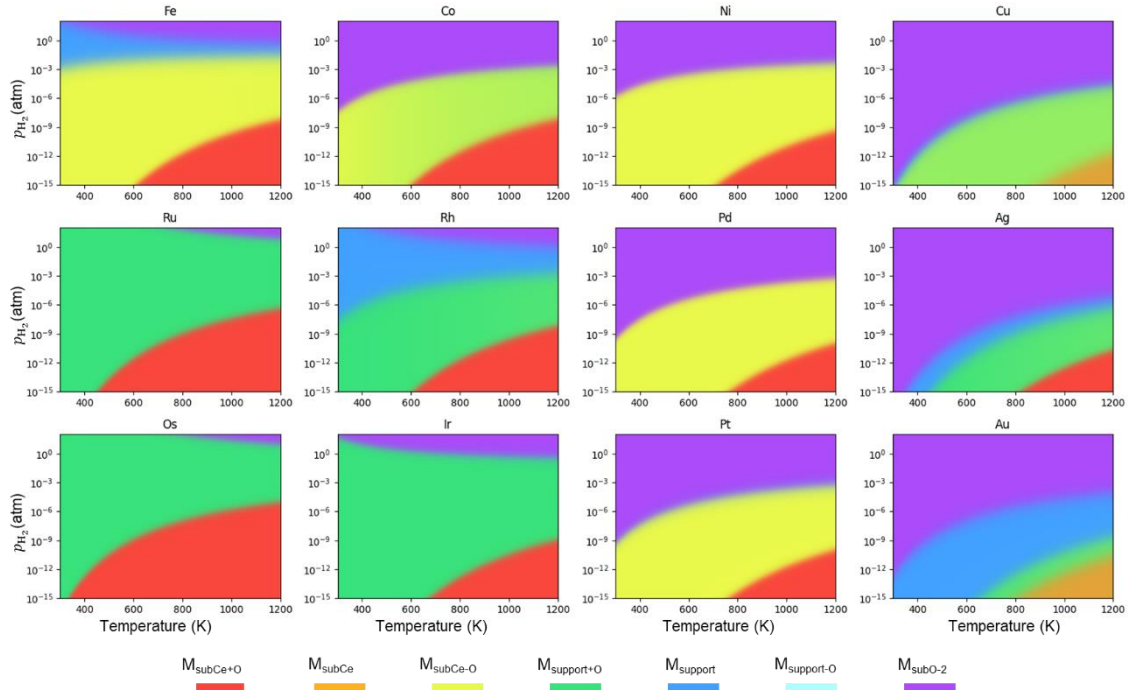

**Figure S12.** Phase diagrams of  $M_1/\text{CeO}_2$  SACs in reductive conditions. The partial pressure of water vapor is 1 bar. Each phase is represented by a distinct RGB color ( $RGB_i$ ), and the color of each point in the phase diagram is defined as the overlay of  $RGB_i$  weighted by the proportion of each phase. Therefore, the yellow and green color mixing area in the phase diagram of Co SAC indicates a coexistence of  $\text{Co}_{\text{subCe-O}}$  and  $\text{Co}_{\text{support+O}}$  types of structures, this is because their formation energies are close, with an energy difference of only 0.07 eV.

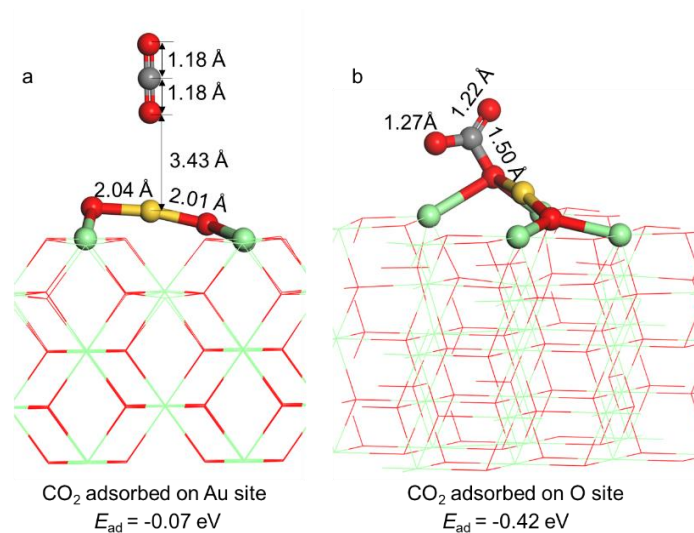

**Figure S13.** CO<sub>2</sub> adsorption modes on the LES. (a) Physisorption of CO<sub>2</sub> on the positively charged Au site. (b) Chemisorption of CO<sub>2</sub> on the surface O site.  $E_{\text{ad}}$  is defined as  $E_{\text{tot}} - E_{\text{slab}} - E_{\text{CO}_2}$ , where  $E_{\text{tot}}$  is the energy of adsorbed structure,  $E_{\text{slab}}$  is the energy of the clean surface,  $E_{\text{CO}_2}$  is the energy of CO<sub>2</sub> gas molecule.

The C-O bond length of CO<sub>2</sub> in (a) is the same as that of gas phase CO<sub>2</sub>, so the CO<sub>2</sub> in (a) is not activated. Besides, the CO<sub>2</sub> adsorption mode in (a) is higher in energy than that in (b). Thus, (a) is ignored in the following consideration.

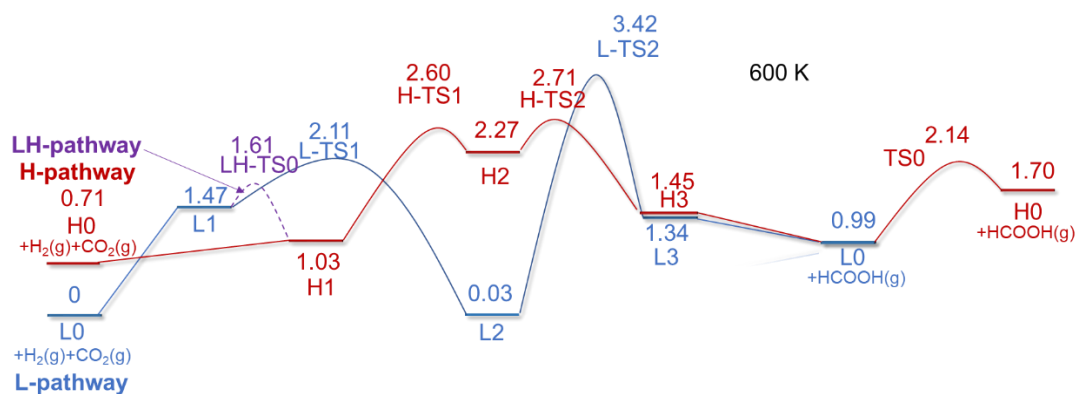

**Figure S14.** Free energy profiles (in eV) of CO<sub>2</sub>HR on Au<sub>1</sub>/CeO<sub>2</sub> SAC at 600 K.

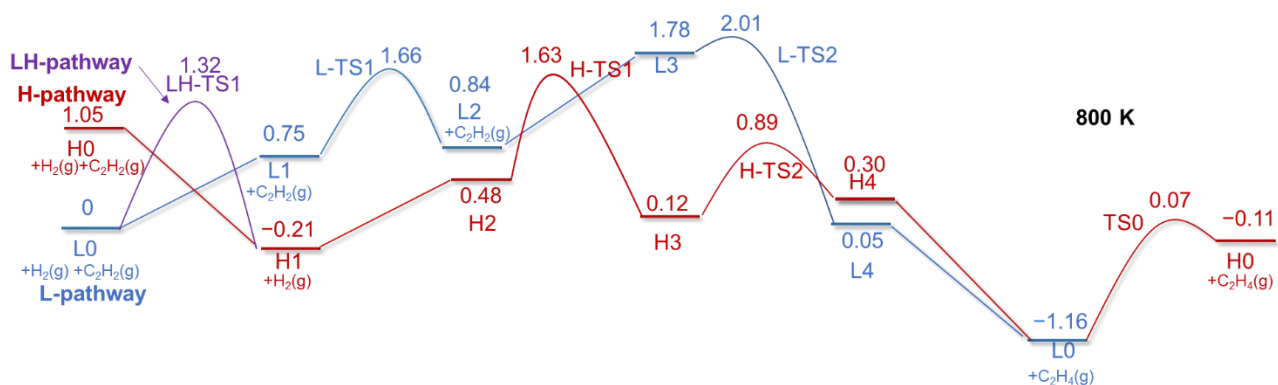

**Figure S15.** Free energy profiles (in eV) of SHA on Pt<sub>1</sub>/CeO<sub>2</sub> SAC at 800 K.

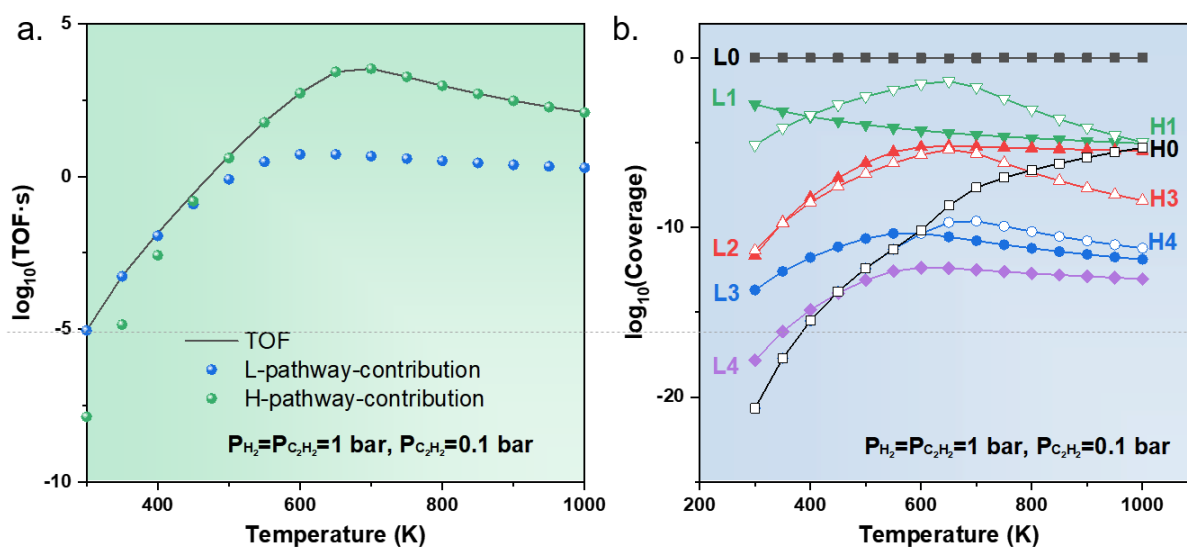

**Figure S16.** Calculated (a) TOF and (b) coverages of states as functions of temperature for the SHA on Pt<sub>1</sub>/CeO<sub>2</sub> SAC, assuming that there is no LH-pathway.



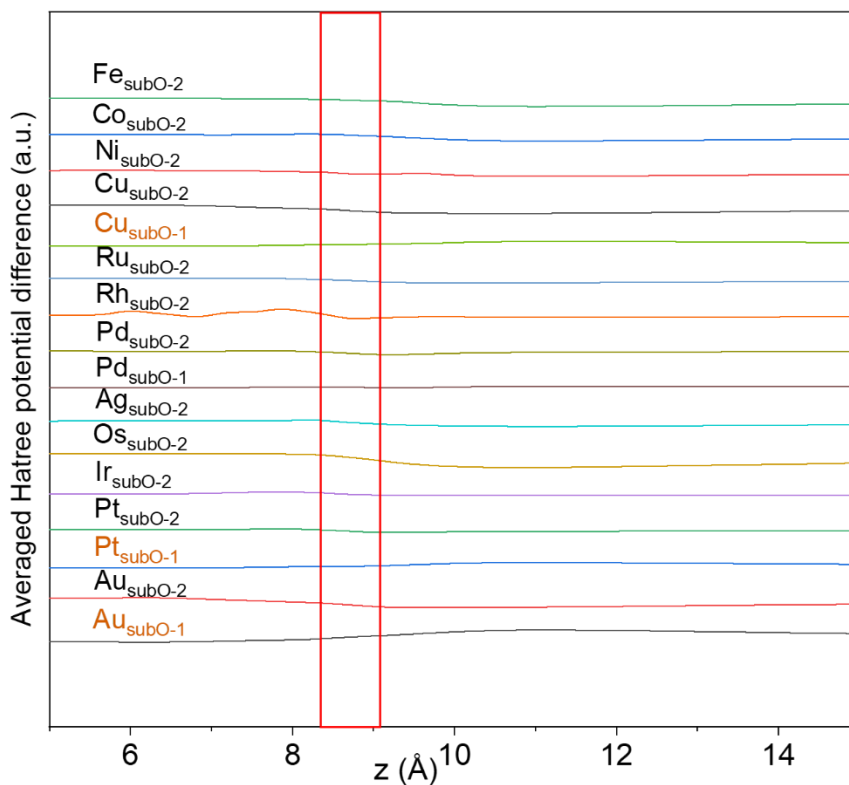

**Figure S17.** Hartree potential differences projected onto the  $z$ -axis. The Hartree potential difference ( $\Delta V_H$ ) is defined as  $\Delta V_H = V_{H-SA/support} - V_{H-support} - V_{H-SA}$ , where  $V_{H-SA/support}$ ,  $V_{H-support}$ ,  $V_{H-SA}$  are the Hartree potentials of SAC, isolated support, and the isolated single-atom, respectively. In general,  $\Delta V_H$  can be regarded as a measure of the change in the interface local potential induced by the metal adatom. The increase of  $\Delta V_H$  along the  $z$ -direction indicates the charge transfer from the support to the metal adatom, and the decrease of  $\Delta V_H$  implies the opposite.

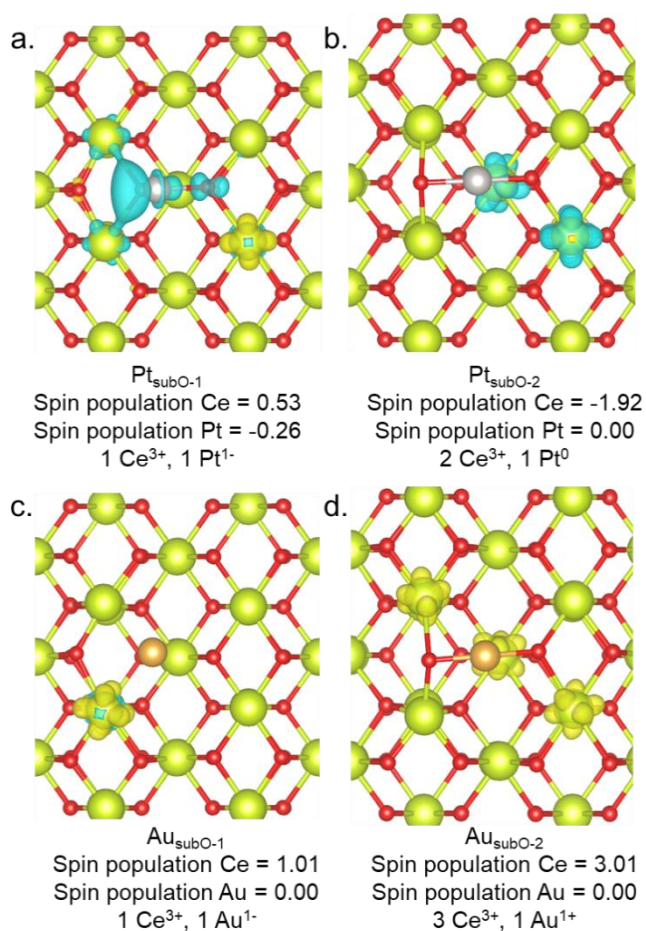

**Figure S18.** Spin density isosurfaces at  $0.005 \text{ e/Bohr}^3$ . The yellow and cyan isosurfaces represent the alpha and beta spins, respectively. The unpaired electron in Ce  $4f$  orbital is clearly displayed, which can be used to identify the  $\text{Ce}^{3+}$  ions. One  $\text{O}_v$  will leave two extra electrons in the  $\text{CeO}_2$  support, which create two  $\text{Ce}^{3+}$ . Extra electrons transferred from  $\text{M}_1$  also create  $\text{Ce}^{3+}$  ions. Thus, the oxidation state of  $\text{M}_1$  formally equals to  $n(\text{Ce}^{3+}) - 2$ , where  $n(\text{Ce}^{3+})$  is the total number of  $\text{Ce}^{3+}$  ions.

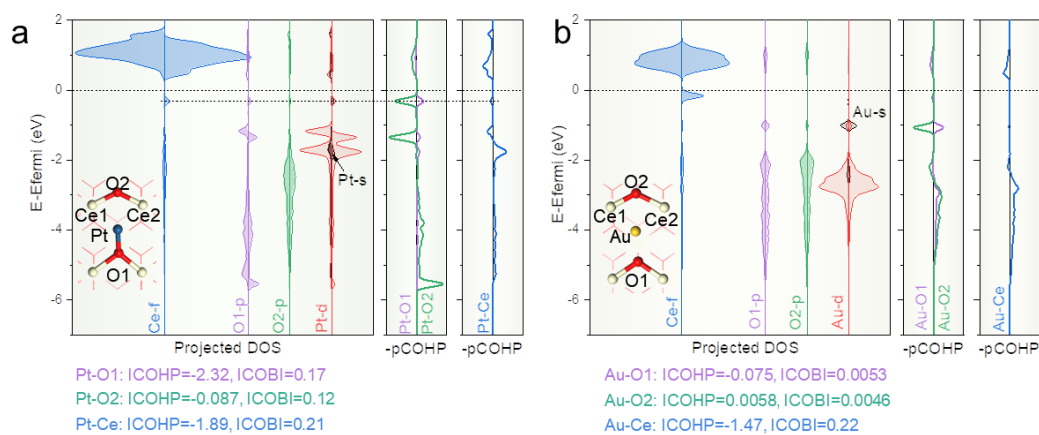

**Figure S19.** Projected densities of states (pDOSs) and projected crystal orbital Hamilton populations (pCOHPs) of the negatively charged (a) Pt<sub>1</sub>/CeO<sub>2</sub> and (b) Au<sub>1</sub>/CeO<sub>2</sub> SACs.

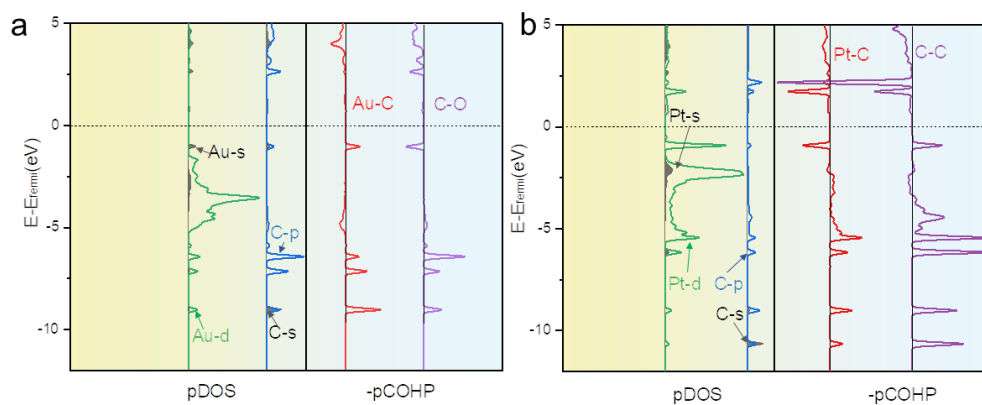

**Figure S20.** The pDOSs and pCOHPs of (a) CO<sub>2</sub> adsorption on Au<sub>1</sub>/CeO<sub>2</sub> and (b) C<sub>2</sub>H<sub>2</sub> adsorption on Pt<sub>1</sub>/CeO<sub>2</sub>.

**Table S1.** Relative energy of each state.

|    | Most stable state<br>$M_{\text{subO-2}}$ | Transition state<br>(from $M_{\text{subO-2}}$ to $M_{\text{subO-1}}$ ) | Metastable state<br>$M_{\text{subO-1}}$ |
|----|------------------------------------------|------------------------------------------------------------------------|-----------------------------------------|
| Cu | 0 eV                                     | 1.96 eV                                                                | 1.93 eV                                 |
| Pd | 0 eV                                     | 1.17 eV                                                                | 1.07 eV                                 |
| Pt | 0 eV                                     | 1.23 eV                                                                | 1.05 eV                                 |
| Au | 0 eV                                     | 1.15 eV                                                                | 0.71 eV                                 |

**Table S2.** The 1s core level shift and oxidative state (OS) of M in each model.

| Oxidation state<br>Reference      |    | -1<br>MCs | 0<br>M | +1<br>MCl | +2<br>MO | $M_{\text{subO-1}}$ | $M_{\text{subO-2}}$ |
|-----------------------------------|----|-----------|--------|-----------|----------|---------------------|---------------------|
| Relative 1s<br>core level<br>(eV) | Pt | -0.72     | 0.00   | 1.39      | 3.06     | -0.20<br>(-1)       | 0.0007<br>(0)       |
|                                   | Au | -1.68     | 0.00   | 1.46      | 2.68     | -0.33<br>(-1)       | 1.08<br>(+1)        |

The oxidation states of M in MCs, M, MCl, and MO gas phase molecules are formally -1, 0, +1, and +2, respectively. The relative 1s core level is defined as the 1s core level of M in each model referenced to that in the gas phase M atom. The core level is corrected by putting an Ar atom in the unit cell to make sure that the energy difference between the 1s level of Ar and vacuum level is constant. The oxidation state (number in parenthesis) of  $M_1$  in the SAC is determined by considering the sign of core level shift first and then its absolute value.

## References

1. Tang, Y.; Wang, Y.-G.; Li, J., Theoretical Investigations of Pt1@CeO2 Single-Atom Catalyst for CO Oxidation. *J. Phys. Chem. C* **2017**, *121* (21), 11281-11289.
2. Zhao, S.; Kang, D.; Liu, Y.; Wen, Y.; Xie, X.; Yi, H.; Tang, X., Spontaneous Formation of Asymmetric Oxygen Vacancies in Transition-Metal-Doped CeO2 Nanorods with Improved Activity for Carbonyl Sulfide Hydrolysis. *ACS Catal.* **2020**, *10* (20), 11739-11750.
3. Chen, Y.; Hu, P.; Lee, M.-H.; Wang, H., Au on (111) and (110) surfaces of CeO2: A density-functional theory study. *Surf. Sci.* **2008**, *602* (10), 1736-1741.
4. Tang, Y.; Wei, Y.; Wang, Z.; Zhang, S.; Li, Y.; Nguyen, L.; Li, Y.; Zhou, Y.; Shen, W.; Tao, F. F.; Hu, P., Synergy of Single-Atom Ni1 and Ru1 Sites on CeO2 for Dry Reforming of CH4. *J. Am. Chem. Soc.* **2019**, *141* (18), 7283-7293.
5. Song, W.; Su, Y.; Hensen, E. J. M., A DFT Study of CO Oxidation at the Pd-CeO2(110) Interface. *J. Phys. Chem. C* **2015**, *119* (49), 27505-27511.
6. Tian, D.; Zeng, C.; Wang, H.; Cheng, X.; Zheng, Y.; Xiang, C.; Wei, Y.; Li, K.; Zhu, X., Effect of transition metal Fe adsorption on CeO2 (110) surface in the methane activation and oxygen vacancy formation: A density functional theory study. *Appl. Surf. Sci.* **2017**, *416*, 547-564.
7. Cui, L.; Tang, Y.; Zhang, H.; Hector, L. G.; Ouyang, C.; Shi, S.; Li, H.; Chen, L., First-principles investigation of transition metal atom M (M = Cu, Ag, Au) adsorption on CeO2(110). *Phys. Chem. Chem. Phys.* **2012**, *14* (6), 1923.
8. Tang, Y.; Asokan, C.; Xu, M.; Graham, G. W.; Pan, X.; Christopher, P.; Li, J.; Sautet, P., Rh single atoms on TiO2 dynamically respond to reaction conditions by adapting their site. *Nat. Comm.* **2019**, *10* (1), 4488.
